# Supplementary material for: Accessing the Impact of Meteorological Variables on Machine Learning Flood Susceptibility Mapping
Source: MDPI journal article supplement (doi:10.3390/rs14071656), 2022-03-30
Supplement: s1 [file s1]

Archive with 1 entries (1 files):
- remotesensing-1596739-supplementary.pdf
